# Supplementary material for: Construction of homochiral alkaline–lanthanide heteronuclear helicates with Na+-selective bonding in the self-assembly process
Source: Royal Society of Chemistry journal article supplement (doi:10.1039/c9dt02483b), 2019-01-01
Supplement: c9dt02483b1.pdf [file c9dt02483b1.pdf]

## Supporting Information

### Construction of Homochiral Alkaline-lanthanide Heteronuclear

#### Helicates with Na<sup>+</sup>-selective Bonding in Self-assembly Process

Ge Li,<sup>a</sup> Li Wang,<sup>b</sup> Qingxin Han,<sup>c</sup> Weisheng Liu\*<sup>a</sup>

*a. Key Laboratory of Nonferrous Metals Chemistry and Resources Utilization of Gansu Province and State Key Laboratory of Applied Organic Chemistry, College of Chemistry and Chemical Engineering, Lanzhou University, Lanzhou 730000, P. R. China*

*b. College of Chemistry and Chemical Engineering, Xi'an Shiyou University, Xi'an 710065, P.R. China*

*c. College of Bioresources Chemistry and Materials Engineering, Shaanxi University of Science and Technology, Xi'an 710021, China*

*E/mail: liuws@lzu.edu.cn*

#### Synthesis of the ligand

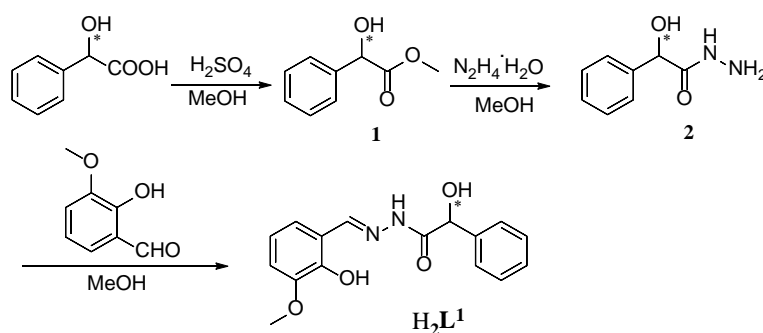

Scheme S1. Preparation of ligand H<sub>2</sub>L<sup>1</sup>.

#### Methyl mandelate (1).

Mandelic acid (9.0 g, 0.059 mol) was dissolved in methanol (200 ml) and was slowly added with concentrated sulfuric acid (1.5 ml). After the reaction, adjusted pH = 7-8 with saturated aqueous NaHCO<sub>3</sub> solution, and extracted with ethyl acetate. The organic phase solvent was removed in vacuo and placed in freezer to give a white solid **1**. (9.5 g, yield 97%).

#### 2-hydroxy-2-phenylacetohydrazide (2)

Methyl mandelate (9.5 g, 0.057 mol) was dissolved in methanol (200 ml) and added with N<sub>2</sub>H<sub>4</sub>·H<sub>2</sub>O (3.7 g). After refluxed for 12 hours, the solvent was removed in vacuo and obtain a white solid **2**. (9.4 g, yield 98%).

#### Ligand H<sub>2</sub>L<sup>1</sup>

2-hydroxy-2-phenylacetohydrazide (9.4 g, 0.056 mol) was dissolved in 200 ml methanol and added with 2-hydroxy-3-methoxybenzaldehyde (8.6 g, 0.057 mol). The solution was refluxed for 12 h and removed the solvent in vacuo to obtain a yellow powder (15 g, yield 94.6%).

#### Ligand H<sub>2</sub>L<sup>2</sup>

The synthesis of ligand H<sub>2</sub>L<sup>2</sup> was the same as H<sub>2</sub>L<sup>1</sup> except that

2-hydroxy-3-methoxybenzaldehyde was substituted for salicylaldehyde.

#### *S*-H<sub>2</sub>L<sup>1</sup>

$[\alpha]_D^{20} = -35 \text{ cm}^3 \text{ g}^{-1} \text{ dm}^{-1}$  ( $c = 0.002 \text{ g cm}^{-3}$ , methanol). <sup>1</sup>H-NMR (400 MHz, CD<sub>3</sub>OD)  $\delta$  8.50 (s, 1H), 7.54 – 7.46 (m, 2H), 7.38 – 7.27 (m, 3H), 7.07 (dd,  $J = 8.0, 1.5 \text{ Hz}$ , 1H), 6.96 (dd,  $J = 8.1, 1.6 \text{ Hz}$ , 1H), 6.81 (t,  $J = 8.0 \text{ Hz}$ , 1H), 5.17 (s, 1H), 3.82 (s, 3H). <sup>13</sup>C-NMR (400 MHz, DMSO-D<sub>6</sub>)  $\delta$  56.19, 73.85, 114.12, 119.03, 119.41, 121.40, 127.02, 128.15, 128.67, 141.05, 147.42, 148.36, 149.26, 169.09. ESI-MS  $m/z$ : calcd. for C<sub>16</sub>H<sub>16</sub>N<sub>2</sub>O<sub>4</sub> 300.1, found:301.1 [M+H]<sup>+</sup>.

#### *R*-H<sub>2</sub>L<sup>1</sup>

$[\alpha]_D^{21} = +35 \text{ cm}^3 \text{ g}^{-1} \text{ dm}^{-1}$  ( $c = 0.002 \text{ g cm}^{-3}$ , methanol). <sup>1</sup>H-NMR (400 MHz, CD<sub>3</sub>OD)  $\delta$  8.51(s, 1H), 7.53-7.4(m, 3H), 7.3-7.28(m, 4H), 7.08(dd,  $J = 7.9, 1.5\text{Hz}$ , 1H), 6.98 (dd,  $J = 8.0, 1.4\text{Hz}$ , 1H), 5.17 (s, 1H), 3.83 (s, 3 H). <sup>13</sup>C-NMR (400 MHz, DMSO-D<sub>6</sub>)  $\delta$  56.42, 73.91, 114.45, 119.24, 119.40, 121.53, 127.01, 128.16, 128.50, 141.07, 147.69, 148.40, 149.39, 169.10. ESI-MS  $m/z$ : calcd. for C<sub>16</sub>H<sub>16</sub>N<sub>2</sub>O<sub>4</sub> 300.1, found:301.1 [M+H]<sup>+</sup>.

#### *S*-H<sub>2</sub>L<sup>2</sup>

$[\alpha]_D^{21} = -40 \text{ cm}^3 \text{ g}^{-1} \text{ dm}^{-1}$  ( $c = 0.002 \text{ g cm}^{-3}$ , methanol). <sup>1</sup>H-NMR (400 MHz, CD<sub>3</sub>OD)  $\delta$  8.45 (s, 1H), 7.61–7.43 (m, 2H), 7.39–7.20 (m, 5H), 6.86 (dt,  $J = 7.9, 5.2, 2.6 \text{ Hz}$ , 2H), 5.18 (s, 1H). <sup>13</sup>C-NMR (400 MHz, CD<sub>3</sub>OD)  $\delta$  73.76, 115.81, 117.70, 119.28, 125.73, 128.41, 129.99, 131.09, 139.52, 151.01, 157.55, 170.15. ESI-MS  $m/z$ : calcd. for C<sub>15</sub>H<sub>14</sub>N<sub>2</sub>O<sub>3</sub> 270.1.1, found:271.1 [M+H]<sup>+</sup>

#### *R*-H<sub>2</sub>L<sup>2</sup>

$[\alpha]_D^{21} = +40 \text{ cm}^3 \text{ g}^{-1} \text{ dm}^{-1}$  ( $c = 0.002 \text{ g cm}^{-3}$ , methanol). <sup>1</sup>H-NMR (400 MHz, CD<sub>3</sub>OD)  $\delta$  8.46 (s, 1H), 7.54 – 7.43 (m, 3H), 7.43 – 7.20 (m, 8H), 6.92 – 6.79 (m, 3H), 5.18 (s, 1H). <sup>13</sup>C-NMR (400 MHz, CD<sub>3</sub>OD)  $\delta$  73.72, 116.18, 117.74, 119.15, 126.55, 127.78, 128.159, 130.43, 139.60, 151.02, 158.05, 170.24. ESI-MS  $m/z$ : calcd. for C<sub>15</sub>H<sub>14</sub>N<sub>2</sub>O<sub>3</sub> 270.1.1, found:271.1 [M+H]<sup>+</sup>.

## Synthesis of Complexes

### *[Dy<sub>2</sub>Na<sub>3</sub>{(S)-HL<sup>1</sup>}<sub>6</sub>].3NO<sub>3</sub>.solvent (1a)*

(*S*)-H<sub>2</sub>L<sup>1</sup>(0.06 mmol, 0.0180g) was added into 1 ml methanol solution of NaOH (0.1 M) and added with 2 ml acetonitrile. After the mixture had been stirred for 3 min, 0.03 mmol Dy(NO<sub>3</sub>)<sub>3</sub>·6H<sub>2</sub>O(0.0137 g) was added. Then, the solution was stirred for 3 min until obtain a clearly yellow solution. The crystals of complex **1a** suitable for single-crystal X-ray diffraction analysis were obtained 47% yield by slow evaporation of the solution with one week at room temperature in air. Elemental analysis for complex **1a** C<sub>96</sub>H<sub>90</sub>Dy<sub>2</sub>N<sub>15</sub>Na<sub>3</sub>O<sub>33</sub> (non-coordinated solvent molecules were lost by drying): C, 47.68; H, 3.71; N, 8.60 (calculated: C, 48.48; H, 3.79; N, 8.83.) IR (KBr,  $\nu$ , cm<sup>-1</sup>): 3199(m), 3028(w), 2835(w), 1604(s), 1541(m), 1454(s), 1380(s), 1296(m), 1218(s), 1082(m), 948(w), 848(m), 732(s), 694(m), 619(w).

### *[Dy<sub>2</sub>Na<sub>3</sub>{(R)-HL<sup>1</sup>}<sub>6</sub>].3NO<sub>3</sub>.solvent (1b)*

The synthesis steps of enantiomer complex **1b** was the same procedure as that for complex **1a**, except that (*R*)-H<sub>2</sub>L<sup>1</sup> instead of (*S*)-H<sub>2</sub>L<sup>1</sup>. The crystals of complex **1b** suitable for single-crystal X-ray diffraction analysis were obtained 45% yield by slow

evaporation of the solution with one week at room temperature in air. Elemental analysis for complex **1b** C<sub>96</sub>H<sub>90</sub>Dy<sub>2</sub>N<sub>15</sub>Na<sub>3</sub>O<sub>33</sub> (non-coordinated solvent molecules were lost by drying): C, 47.78; H, 3.65; N, 8.71 (calculated: C, 48.48; H, 3.79; N, 8.83.) IR (KBr,  $\nu$ , cm<sup>-1</sup>): 3446(w), 3033(w), 1602(s), 1546(w), 1448(s), 1380(s), 1296(m), 1082(m), 947(w), 852(w), 742(s), 694(w), 621(w).

[Dy<sub>4</sub>( $\mu_4$ -OH) {(S)-HL<sup>2</sup>}<sub>8</sub>].3NO<sub>3</sub>.MeOH.4H<sub>2</sub>O (**2a**)

The synthesis steps of complex **2a** was the same procedure as that for complex **1a**, except that (S)-H<sub>2</sub>L<sup>2</sup> instead of (S)-H<sub>2</sub>L<sup>1</sup>. Elemental analysis for complex **2a** C<sub>120</sub>H<sub>105</sub>Dy<sub>4</sub>N<sub>19</sub>O<sub>34</sub> (non-coordinated solvent molecules were lost by drying): C, 46.65; H, 3.68; N, 8.69 (calculated: C, 47.58; H, 3.57; N, 8.79.) IR (KBr,  $\nu$ , cm<sup>-1</sup>): 3296(m), 3037(w), 1631(s), 1604(s), 1544(m), 1471(m), 1438(m), 1379(s), 1319(w), 1284(s), 1199(m), 1155(w), 1066(w), 960(w), 896(m), 759(m), 732(m), 694(m), 586(w), 511(w).

[Dy<sub>4</sub>( $\mu_4$ -OH) {(R)-HL<sup>2</sup>}<sub>8</sub>].3NO<sub>3</sub>.2CH<sub>3</sub>CN.6H<sub>2</sub>O (**2b**)

The synthesis steps of complex **2b** was the same procedure as that for complex **1a**, except that (R)-H<sub>2</sub>L<sup>2</sup> instead of (S)-H<sub>2</sub>L<sup>1</sup>. Elemental analysis for complex **2b** C<sub>120</sub>H<sub>105</sub>Dy<sub>4</sub>N<sub>19</sub>O<sub>34</sub> (non-coordinated solvent molecules were lost by drying): C, 46.81; H, 3.72; N, 8.73 (calculated: C, 47.58; H, 3.57; N, 8.79.) IR (KBr,  $\nu$ , cm<sup>-1</sup>): 3290(m), 3031(w), 1641(s), 1608(s), 1544(m), 1471(m), 1438(m), 1380(s), 1319(w), 1284(s), 1197(w), 1149(w), 1060(w), 894(w), 757(m), 732(m), 694(w), 588(w), 511(w).

## Mixed-metal Self-assembly Experiments

In this work, (S)-H<sub>2</sub>L<sup>1</sup> was used as an example to illustrate the Na<sup>+</sup>-selective bonding in self-assembly process. (S)-H<sub>2</sub>L<sup>1</sup> (0.06 mmol, 0.0180g) dissolved in 3 ml acetonitrile was deprotonated by adding 2 ml methanol solution of KOH (0.1 M) and stirred for 3 min. After the ligand was completely dissolved, 0.03 mmol various metal ions (including Dy<sup>3+</sup>, Li<sup>+</sup>, Na<sup>+</sup>, Mg<sup>2+</sup> and Ca<sup>2+</sup>, the lanthanide salt is nitrate and the other metal salts is perchlorate) was added, respectively. Then, the solution was stirred for 3 min until obtain a clearly yellow solution. The crystal of complex was obtained by slow evaporation of the solution about two weeks at room temperature in air.

## Materials and Methods

All reagents and solvents were purchased from commercial sources and used without further purification. <sup>1</sup>H-NMR spectra were recorded on a JNM-ECS-400 MHz spectrometer and referenced to the solvent signals. The infrared spectra were obtained by a Burker VERTEX 70 FT-IR spectrometer using KBr pellets in the range from 400 cm<sup>-1</sup> to 4000 cm<sup>-1</sup>. X-ray powder diffraction data of all samples were recorded on a PANalytical X'Pert Pro Diffractometer equipped with Cu K $\alpha$  radiation ( $\lambda$  = 1.5406 Å) and operated at 40 kV and 40 mA with scanning ranges from 3° to 50°. The solution CD spectra were recorded on an Olis DSM 1000 spectropolarimeter. HRESI-MS were performed on Fourier Transform Ion Cyclotron Resonance Mass Spectrometer.

Crystal datas for all complexes were collected on a Bruker FRAMBO diffractometer (**1a** and **2a**: Mo K $\alpha$  radiation,  $\lambda$  = 0.71073 Å; **1b** and **2b**: Cu K $\alpha$  radiation,  $\lambda$  = 1.5418 Å). Data reduction was accomplished by the Bruker SAINT program. Structures were

solved by direct methods and refined by a full matrix least-squares technique based on  $F^2$  using the Olex2 program. All non-hydrogen atoms were refined anisotropically. For **1a** and **1b**, due to the serious disorder of the solvent molecules, we removed the solvent molecules with SQUEEZE. The details of the crystal parameters, data collections and refinements are summarized in Table S1. Selected bond lengths and angles for all complexes are given in Table S2.

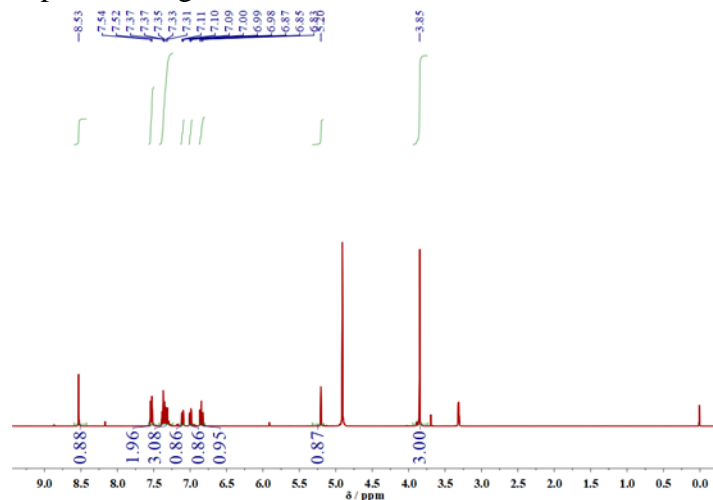

**Figure S1**  $^1\text{H-NMR}$  spectrum (400 MHz,  $\text{CD}_3\text{OD}$ ) of ligand (*S*)- $\text{H}_2\text{L}^1$ .

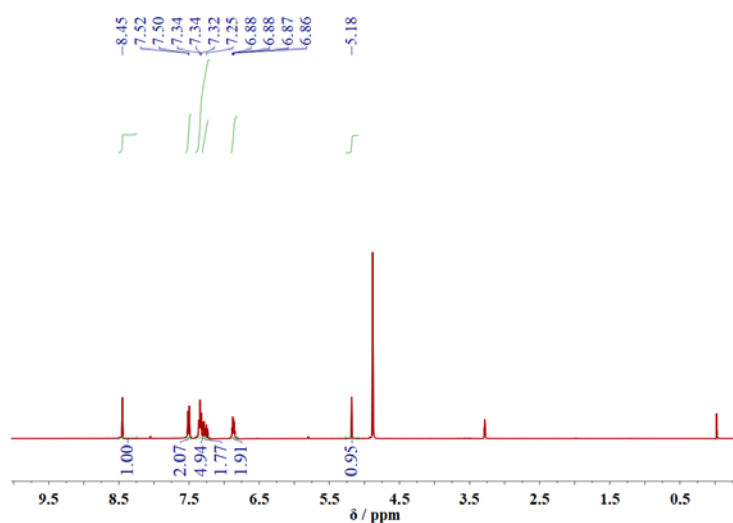

**Figure S2**  $^1\text{H-NMR}$  spectrum (400 MHz,  $\text{CD}_3\text{OD}$ ) of ligand (*S*)- $\text{H}_2\text{L}^2$ .

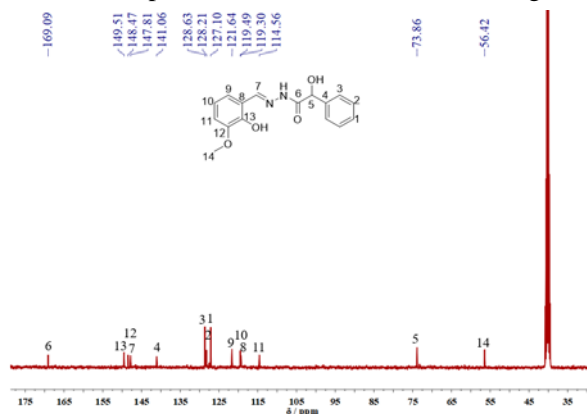

**Figure S3**  $^{13}\text{C-NMR}$  (400 MHz,  $\text{DMSO-d}_6$ ) spectra of the (*S*)- $\text{H}_2\text{L}^1$ .

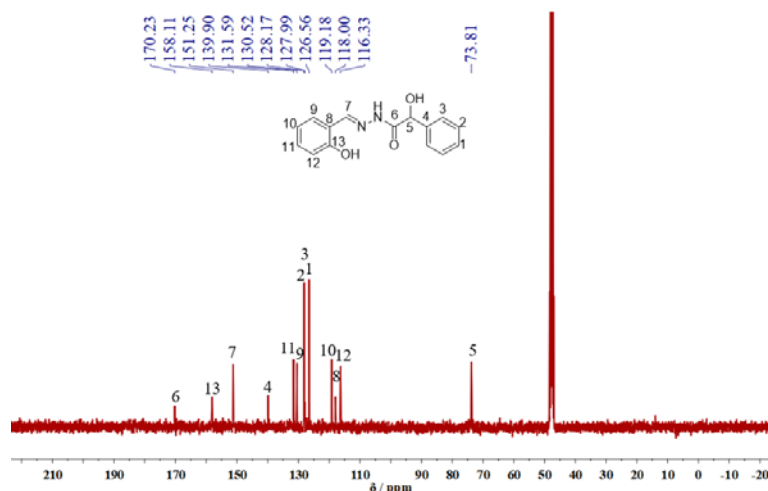

**Figure S4**  $^{13}\text{C}$ -NMR (400 MHz,  $\text{CD}_3\text{OD}$ ) spectra of the  $(S)$ - $\text{H}_2\text{L}^2$ .

**Table S1** Crystal Data and Structure Refinement Parameters for Complexes.

|                                           | Complex <b>1a</b>            | Complex <b>1b</b>            | Complex <b>2a</b>                             | Complex <b>2b</b>                             |
|-------------------------------------------|------------------------------|------------------------------|-----------------------------------------------|-----------------------------------------------|
| Crystal System                            | orthorhombic                 | orthorhombic                 | orthorhombic                                  | orthorhombic                                  |
| Space Group                               | C222 <sub>1</sub>            | C222 <sub>1</sub>            | P2 <sub>1</sub> 2 <sub>1</sub> 2 <sub>1</sub> | P2 <sub>1</sub> 2 <sub>1</sub> 2 <sub>1</sub> |
| a (Å)                                     | 21.876(6)                    | 20.2482(2)                   | 16.4632(2)                                    | 16.5304(4)                                    |
| b (Å)                                     | 20.204(5)                    | 21.6632(2)                   | 21.6760(4)                                    | 21.5083(5)                                    |
| c (Å)                                     | 56.153(14)                   | 55.8238(6)                   | 34.7600(6)                                    | 34.7813(7)                                    |
| $\alpha$ (°)                              | 90                           | 90                           | 90                                            | 90                                            |
| $\beta$ (°)                               | 90                           | 90                           | 90                                            | 90                                            |
| $\gamma$ (°)                              | 90                           | 90                           | 90                                            | 90                                            |
| Z                                         | 8                            | 4                            | 4                                             | 4                                             |
| Volume (Å <sup>3</sup> )                  | 24819(11)                    | 24486.6(4)                   | 12404.3(4)                                    | 12366.2(5)                                    |
| $\rho_{\text{calc}}$ g/cm <sup>3</sup>    | 1.272                        | 1.391                        | 1.645                                         | 1.515                                         |
| $\mu$ (mm <sup>-1</sup> )                 | 1.279                        | 7.271                        | 2.471                                         | 13.327                                        |
| F(000)                                    | 9600.0                       | 10408.0                      | 6116.0                                        | 5600.0                                        |
| Temperature                               | 296.15                       | 120.15                       | 100.00(10)                                    | 153.15                                        |
| Reflections collected                     | 61577                        | 42501                        | 85131                                         | 92228                                         |
| Independent ref.                          | 21795                        | 22338                        | 24435                                         | 20889                                         |
| Data/restraints/parameters                | 21795/211/1340               | 22338/181/1544               | 24435/3181/1652                               | 20889/2804/1494                               |
| R <sub>int</sub>                          | 0.0537                       | 0.0313                       | 0.0573                                        | 0.0541                                        |
| Flack parameter                           | 0.071(13)                    | -0.0013(16)                  | -0.009(5)                                     | 0.049(4)                                      |
| Final R indices<br>[I > 2.0 $\sigma$ (I)] | R1 = 0.0596,<br>wR2 = 0.1323 | R1 = 0.0461, wR2 =<br>0.1261 | R1 = 0.0582,<br>wR2 = 0.1479                  | R1 = 0.0360,<br>wR2 = 0.0929                  |
| Final R indexes [all data]                | R1 = 0.0640,<br>wR2 = 0.1342 | R1 = 0.0495, wR2 =<br>0.1284 | R1 = 0.0763,<br>wR2 = 0.1618                  | R1 = 0.0375,<br>wR2 = 0.0938                  |
| GOF                                       | 1.098                        | 1.065                        | 1.041                                         | 1.021                                         |

**Table S2** Selected Bond Lengths (Å) and Angles (°) for All Complexes.

| Complex 1a       |           |                   |          |                     |          |              |          |
|------------------|-----------|-------------------|----------|---------------------|----------|--------------|----------|
| Dy(1)-O(2)       | 2.312(7)  | Na(1)-O(7)        | 2.315(9) | Na(2)-O(3)1         | 2.290(8) | Na(4)-O(14)  | 2.323(9) |
| Dy(1)-O(1)       | 2.328(7)  | Na(1)-O(2)        | 2.300(8) | Dy(2)-O(15)         | 2.322(8) | Na(4)-O(15)  | 2.544(9) |
| Dy(1)-O(3)       | 2.319(7)  | Na(1)-O(1)1       | 2.297(9) | Dy(2)-O(23)         | 2.385(8) | Na(4)-O(15)2 | 2.309(9) |
| Dy(1)-O(8)       | 2.437(7)  | Na(1)-O(1)        | 2.587(8) | Dy(2)-O(17)         | 2.427(9) | Na(4)-O(16)2 | 2.334(9) |
| Dy(1)-O(11)      | 2.371(8)  | Na(1)-O(3)1       | 2.615(8) | Dy(2)-O(20)         | 2.404(8) | Na(3)-O(13)  | 3.109(1) |
| Dy(1)-O(5)       | 2.433(8)  | Na(2)-O(4)        | 2.321(9) | Dy(2)-N(9)          | 2.601(9) | Na(3)-O(13)2 | 2.316(9) |
| Dy(1)-N(3)       | 2.627(8)  | Na(2)-O(4)1       | 2.321(9) | Dy(2)-N(7)          | 2.599(1) | Na(3)-O(22)2 | 2.316(9) |
| Dy(1)-N(1)       | 2.584(10) | Na(2)-O(2)        | 2.589(8) | Dy(2)-N(11)         | 2.594(9) | Na(3)O(22)   | 2.339(1) |
| Dy(1)-N(5)       | 2.604(9)  | Na(2)-O(2)1       | 2.589(8) | Na(4)-O(19)         | 2.330(9) | Na(3)-O(14)2 | 2.339(1) |
| Na(1)-O(10)1     | 2.333(8)  | Na(2)-O(3)        | 2.290(8) | Na(4)-O(13)2        | 2.581(9) | Na(3)-O(14)  | 2.537(9) |
| Dy(2)-O(13)      | 3.105(11) | Dy(2)-O(14)       | 2.308(8) |                     |          |              |          |
| O(2)-Dy(1)-O(1)  | 80.8(2)   | O(13)-Dy(2)-O(23) | 130.7(3) | N(5)-Dy(1)-N(3)     | 119.1(3) |              |          |
| O(2)-Dy(1)-O(3)  | 81.3(3)   | O(13)-Dy(2)-O(17) | 141.5(3) | O(10)1-Na(1)-O(1)   | 90.7(3)  |              |          |
| O(2)-Dy(1)-O(8)  | 129.3(3)  | O(13)-Dy(2)-O(20) | 83.0(3)  | O(10)1-Na(1)-O(3)1  | 129.8(3) |              |          |
| O(2)-Dy(1)-O(11) | 80.6(3)   | O(13)-Dy(2)-N(9)  | 75.2(3)  | O(10)1-Na(1)-C(17)  | 141.9(3) |              |          |
| O(2)-Dy(1)-O(5)  | 140.9(3)  | O(13)-Dy(2)-N(7)  | 141.0(3) | O(10)1-Na(1)-C(33)1 | 48.9(3)  |              |          |
| O(2)-Dy(1)-N(3)  | 67.3(3)   | O(13)-Dy(2)-N(11) | 68.4(3)  | O(7)-Na(1)-O(10)1   | 97.6(3)  |              |          |
| O(2)-Dy(1)-N(1)  | 142.1(3)  | O(14)-Dy(2)-O(13) | 79.5(3)  | O(7)-Na(1)-O(1)     | 127.4(3) |              |          |
| O(2)-Dy(1)-N(5)  | 73.8(3)   | O(14)-Dy(2)-O(15) | 80.2(3)  | O(7)-Na(1)-O(3)1    | 92.9(3)  |              |          |
| O(1)-Dy(1)-O(8)  | 142.6(3)  | O(14)-Dy(2)-O(23) | 141.6(3) | O(2)-Na(1)-O(10)1   | 149.0(3) |              |          |
| O(1)-Dy(1)-O(11) | 129.3(3)  | O(14)-Dy(2)-O(17) | 83.2(3)  | O(2)-Na(1)-O(7)     | 70.9(3)  |              |          |
| O(1)-Dy(1)-O(5)  | 81.2(3)   | O(14)-Dy(2)-O(20) | 130.2(3) | O(2)-Na(1)-O(1)     | 75.7(3)  |              |          |
| O(1)-Dy(1)-N(3)  | 141.7(3)  | O(14)-Dy(2)-N(9)  | 68.7(3)  | O(2)-Na(1)-O(3)1    | 80.4(3)  |              |          |
| O(1)-Dy(1)-N(1)  | 74.3(3)   | O(14)-Dy(2)-N(7)  | 74.2(3)  | O(2)-Na(1)-C(17)    | 23.2(3)  |              |          |
| O(1)-Dy(1)-N(5)  | 67.9(3)   | O(14)-Dy(2)-N(11) | 141.8(3) | O(2)-Na(1)-C(33)1   | 147.6(3) |              |          |
| O(3)-Dy(1)-O(1)  | 81.6(3)   | O(15)-Dy(2)-O(13) | 80.4(3)  | O(1)1-Na(1)-O(10)1  | 70.6(3)  |              |          |
| O(3)-Dy(1)-O(8)  | 82.1(3)   | O(15)-Dy(2)-O(23) | 82.6(3)  | O(1)1-Na(1)-O(7)    | 150.0(3) |              |          |
| O(3)-Dy(1)-O(11) | 140.3(3)  | O(15)-Dy(2)-O(17) | 130.0(3) | O(1)1-Na(1)-O(2)    | 132.3(3) |              |          |
| O(3)-Dy(1)-O(5)  | 129.5(3)  | O(15)-Dy(2)-O(20) | 141.5(3) | O(1)1-Na(1)-O(1)    | 81.3(3)  |              |          |
| O(3)-Dy(1)-N(3)  | 73.4(3)   | O(15)-Dy(2)-N(9)  | 143.2(3) | O(1)-Na(1)-O(3)1    | 120.3(3) |              |          |
| O(3)-Dy(1)-N(1)  | 67.4(3)   | O(15)-Dy(2)N(7)   | 67.3(3)  | O(1)1-Na(1)-O(3)1   | 76.1(3)  |              |          |
| O(3)-Dy(1)-N(5)  | 143.0(3)  | O(15)-Dy(2)-N(11) | 74.8(3)  | O(4)-Na(2)-O(4)1    | 96.6(4)  |              |          |
| O(8)-Dy(1)-N(3)  | 62.1(3)   | O(23)-Dy(2)-O(17) | 82.1(3)  | O(4)1-Na(2)-O(2)1   | 129.4(3) |              |          |
| O(8)-Dy(1)-N(1)  | 68.4(3)   | O(23)-Dy(2)-O(20) | 82.4(3)  | O(4)-Na(2)-O(2)     | 129.4(3) |              |          |
| O(8)-Dy(1)-N(5)  | 134.9(3)  | O(23)-Dy(2)-N(9)  | 134.2(3) | O(4)1-Na(2)-O(2)    | 91.7(2)  |              |          |
| O(11)-Dy(1)-O(8) | 82.6(3)   | O(23)-Dy(2)-N(7)  | 67.6(3)  | O(4)-Na(2)-O(2)1    | 91.7(2)  |              |          |
| O(11)-Dy(1)-O(5) | 84.5(3)   | O(23)-Dy(2)-N(11) | 62.6(3)  | O(2)1-Na(2)-O(2)    | 49.0(3)  |              |          |
| O(11)-Dy(1)-N(3) | 67.1(2)   | O(17)-Dy(2)-N(9)  | 66.5(3)  | O(3)1-Na(2)-O(4)    | 97.2(3)  |              |          |

|                    |          |                     |          |                     |           |
|--------------------|----------|---------------------|----------|---------------------|-----------|
| O(11)-Dy(1)-N(1)   | 137.3(3) | O(17)-Dy(2)-N(7)    | 62.8(3)  | O(3)1-Na(2)-O(4)1   | 97.2(3)   |
| O(11)-Dy(1)-N(5)   | 61.7(3)  | O(17)-Dy(2)-N(11)   | 134.9(3) | O(3)-Na(2)-O(4)1    | 77.9(3)   |
| O(5)-Dy(1)-O(8)    | 83.7(2)  | O(20)-Dy(2)-O(17)   | 82.4(3)  | O(3)-Na(2)-O(4)     | 77.9(3)   |
| O(5)-Dy(1)-N(3)    | 137.1(3) | O(20)-Dy(2)-N(9)    | 61.9(3)  | O(3)-Na(2)-O(2)1    | 112.0(2)  |
| O(5)-Dy(1)-N(1)    | 62.3(3)  | O(20)-Dy(2)-N(7)    | 135.9(3) | O(3)1-Na(2)-O(2)    | 112.0(2)  |
| O(5)-Dy(1)-N(5)    | 67.3(3)  | O(20)-Dy(2)-N(11)   | 66.8(3)  | O(3)1-Na(2)-O(2)1   | 37.52(18) |
| N(1)-Dy(1)-N(3)    | 119.6(3) | N(7)-Dy(2)-N(9)     | 119.2(3) | O(22)-Na(3)-O(14)   | 126.9(3)  |
| N(1)-Dy(1)-N(5)    | 120.1(3) | N(11)-Dy(2)-N(9)    | 119.2(3) | O(22)2-Na(3)-O(14)  | 92.5(3)   |
| N(11)-Dy(2)-N(7)   | 119.9(3) | O(15)2-Na(4)-O(13)2 | 75.5(3)  | O(13)-Na(3)-O(22)   | 70.3(3)   |
| O(19)-Na(4)-O(13)2 | -92.2(3) | O(15)2-Na(4)-O(14)  | 130.7(3) | O(13)-Na(3)-O(14)2  | 81.8(3)   |
| O(19)-Na(4)-O(15)  | 126.4(3) | O(15)2-Na(4)-O(15)  | 80.9(3)  | O(13)2-Na(3)-O(14)  | 81.8(3)   |
| O(19)-Na(4)-O(16)2 | 98.8(3)  | O(15)2-Na(4)-O(16)2 | 69.9(3)  | O(13)-Na(3)-O(14)   | 75.2(3)   |
| O(14)-Na(4)-O(19)  | 69.9(3)  | O(16)2-Na(4)-O(13)2 | 125.0(3) | O(13)2-Na(3)-O(14)2 | 75.2(3)   |
| O(14)-Na(4)-O(13)2 | 80.8(3)  | O(16)2-Na(4)-O(15)  | 94.1(3)  | O(22)2-Na(3)-O(22)  | 98.1(5)   |
| O(14)-Na(4)-O(15)  | 75.4(3)  | O(13)-Na(3)-O(13)2  | 132.1(5) | O(22)-Na(3)-O(14)2  | 92.5(3)   |
| O(14)-Na(4)-O(16)2 | 153.1(4) | O(13)-Na(3)-O(22)2  | 150.3(3) | O(22)2-Na(3)O(14)2  | 126.9(3)  |
| O(15)2-Na(4)-O(19) | 151.9(4) | O(13)2-Na(3)-O(22)  | 150.3(3) | O(22)-Na(3)-O(14)   | 126.9(3)  |
| O(15)-Na(4)-O(13)2 | 121.2(3) | O(13)2-Na(3)-O(22)2 | 70.3(3)  | O(22)2-Na(3)-O(14)  | 92.5(3)   |

---

**Complex 1b**

|              |          |              |          |             |          |              |          |
|--------------|----------|--------------|----------|-------------|----------|--------------|----------|
| Dy(2)-N(10)  | 2.587(5) | Dy(2)-N(12)2 | 2.588(5) | Dy(1)-O(1)  | 2.389(5) | Dy(1)-O(2)   | 2.312(4) |
| Na(2)-O(14)2 | 2.288(4) | Dy(1)-O(5)   | 2.424(5) | Na(2)-O(14) | 2.289(4) | Dy(1)-O(6)   | 2.324(5) |
| Dy(1)-O(9)   | 2.391(5) | Na(2)-O(15)2 | 2.315(5) | Dy(1)-O(10) | 2.300(4) | Na(2)-O(22)2 | 2.583(4) |
| Dy(1)-N(2)   | 2.586(6) | Na(2)-O(22)  | 2.583(4) | Dy(1)-N(4)  | 2.595(6) | Dy(1)-N(6)   | 2.591(7) |
| Na(1)-Na(4)  | 3.422(4) | Na(3)-O(14)  | 2.607(5) | Na(1)-O(2)  | 2.583(5) | Na(3)-O(18)  | 2.304(5) |
| Na(1)-O(6)1  | 2.528(5) | Na(3)-O(18)2 | 2.584(5) | Na(1)-O(6)  | 2.311(5) | Na(3)-O(19)  | 2.320(5) |
| Na(1)-O(7)   | 2.355(6) | Na(3)-O(22)  | 2.283(5) | Na(1)-O(10) | 2.328(5) | Na(3)-O(23)  | 2.327(5) |
| Na(1)-O(11)1 | 2.352(5) | Na(4)-O(2)1  | 2.306(5) | Na(4)-O(2)  | 2.306(5) | Na(4)-O(3)1  | 2.342(5) |
| Na(4)-O(3)   | 2.342(5) | Na(4)-O(10)1 | 2.545(5) | Dy(2)-O(13) | 2.425(4) | Dy(2)-O(14)  | 2.307(4) |
| Dy(2)-O(17)  | 2.379(5) | Dy(2)-O(18)  | 2.302(4) | Dy(2)-O(21) | 2.432(4) | Dy(2)-O(22)2 | 2.323(4) |
| Dy(2)-N(8)   | 2.591(6) |              |          |             |          |              |          |

|                    |            |                    |            |                    |            |
|--------------------|------------|--------------------|------------|--------------------|------------|
| O(17)-Dy(2)-O(13)  | 84.47(16)  | O(17)-Dy(2)-O(21)2 | 82.37(16)  | O(17)-Dy(2)-N(8)   | 137.30(17) |
| O(17)-Dy(2)-N(10)  | 62.27(17)  | O(1)-Dy(1)-O(5)    | 82.10(17)  | O(17)-Dy(2)-N(12)2 | 67.53(16)  |
| O(1)-Dy(1)-O(9)    | 83.02(17)  | O(1)-Dy(1)-N(2)    | 62.94(17)  | O(1)-Dy(1)-N(4)    | 67.91(17)  |
| O(1)-Dy(1)-N(6)    | 135.15(18) | O(18)-Dy(2)-O(13)  | 81.40(16)  | O(18)-Dy(2)-O(14)  | 81.72(15)  |
| O(18)-Dy(2)-O(17)  | 129.64(16) | O(18)-Dy(2)-O(21)2 | 142.58(16) | O(2)-Dy(1)-O(1)    | 130.67(16) |
| O(18)-Dy(2)-O(22)  | 80.73(15)  | O(2)-Dy(1)-O(5)    | 141.55(17) | O(18)-Dy(2)-N(8)   | 74.09(17)  |
| O(2)-Dy(1)-O(6)    | 80.73(17)  | O(18)-Dy(2)-N(10)  | 67.61(18)  | O(2)-Dy(1)-O(9)    | 82.49(17)  |
| O(18)-Dy(2)-N(12)  | 140.88(17) | O(2)-Dy(1)-N(2)    | 67.96(17)  | O(2)-Dy(1)-N(4)    | 141.42(18) |
| O(2)-Dy(1)-N(6)    | 74.34(18)  | O(21)2-Dy(2)-N(8)  | 68.58(17)  | O(21)2-Dy(2)-N(10) | 135.56(18) |
| O(21)2-Dy(2)-N(12) | 62.42(17)  | O(5)-Dy(1)-N(2)    | 135.37(18) | O(5)-Dy(1)-N(4)    | 61.91(18)  |

---

|                    |            |                     |            |                    |            |
|--------------------|------------|---------------------|------------|--------------------|------------|
| O(5)-Dy(1)-N(6)    | 67.37(18)  | O(6) -Dy(1)-Na(1)   | 37.08(12)  | O(22)2-Dy(2)-O(13) | 141.21(15) |
| O(22)2-Dy(2)-O(17) | 80.96(15)  | O(22)2-Dy(2)-O(21)2 | 129.09(15) | O(6)-Dy(1)-O(1)    | 82.16(17)  |
| O(22)2-Dy(2)-N(8)  | 141.71(16) | O(6)-Dy(1)-O(5)     | 129.68(17) | O(22)2-Dy(2)-N(10) | 73.59(16)  |
| O(6)-Dy(1)-O(9)    | 141.51(17) | O(22)2-Dy(2)-N(12)2 | 66.74(16)  | O(6)-Dy(1)-N(2)    | 74.53(18)  |
| O(6)-Dy(1)-N(4)    | 67.85(18)  | O(6)-Dy(1)-N(6)     | 142.67(18) | O(9)-Dy(1)-O(5)    | 82.71(17)  |
| O(9)-Dy(1)-N(2)    | 67.09(18)  | O(9)-Dy(1)-N(4)     | 136.09(18) | O(9)-Dy(1)-N(6)    | 61.88(18)  |
| O(10)-Dy(1)-O(2)   | 79.59(17)  | O(10)-Dy(1)-O(5)    | 83.31(17)  | O(10)-Dy(1)-O(6)   | 80.10(16)  |
| O(10)-Dy(1)-O(9)   | 130.11(17) | O(10)-Dy(1)-N(2)    | 141.30(18) | O(14)2-Na(2)-Dy(2) | 111.75(14) |
| O(10)-Dy(1)-N(4)   | 73.61(18)  | O(10)-Dy(1)-N(6)    | 68.51(17)  | N(2)-Dy(1)-N(4)    | 120.76(19) |
| N(2)-Dy(1)-N(6)    | 119.03(18) | O(14)2-Na(2)-O(14)  | 133.1(2)   | O(14)2-Na(2)-O(15) | 71.03(14)  |
| O(14)-Na(2)-O(15)  | 148.48(17) | O(14)2-Na(2)-O(15)  | 148.48(17) | O(14)-Na(2)-O(15)  | 71.03(14)  |
| O(14)-Na(2)-O(22)  | 80.78(15)  | N(6)-Dy(1)-N(4)     | 118.77(19) | O(14)-Na(2)-O(22)2 | 76.21(14)  |
| O(14)2-Na(2)-O(22) | 80.78(15)  | O(14)2-Na(2)-O(22)  | 76.21(14)  | O(15)2-Na(2)-O(15) | 97.0(2)    |
| O(15)-Na(2)-O(22)  | 91.46(14)  | O(15)-Na(2)-O(22)2  | 129.67(15) | O(15)2-Na(2)-O(22) | 91.47(14)  |
| O(6)-Na(1)-O(2)    | 75.46(16)  | O(15)2-Na(2)-O(22)  | 129.67(15) | O(6)1-Na(1)-O(2)   | 120.80(17) |
| O(6)-Na(1)-O(6)1   | 80.75(19)  | O(6)-Na(1)-O(7)     | 69.61(18)  | O(6)-Na(1)-O(10)1  | 130.2(2)   |
| O(7)-Na(1)-O(2)    | 125.4(2)   | O(7)-Na(1)-O(6)1    | 93.57(19)  | O(22)2-Na(2)-O(22) | 119.9(2)   |
| O(10)1-Na(1)-O(2)  | 80.32(17)  | O(10)1-Na(1)O(6)1   | 75.45(17)  | O(10)1-Na(1)-O(7)  | 153.4(2)   |
| O(10)1-Na(1)-O(11) | 69.79(18)  | O(11)1-Na(1)-O(2)   | 93.11(18)  | O(11)1-Na(1)-O(6)1 | 125.7(2)   |
| O(11)1-Na(1)-O(7)  | 99.3(2)    | O(2)1-Na(4)-O(2)    | 131.1(3)   | O(2)1-Na(4)-O(3)1  | 70.54(17)  |
| O(2)-Na(4)-O(3)    | 70.54(17)  | O(2) -Na(4)-O(3)1   | 150.92(19) | O(2)1-Na(4)-O(3)   | 150.92(19) |
| O(2)1-Na(4)-O(10)  | 74.77(16)  | O(2)-Na(4)-O(10)    | 74.78(16)  | O(18)-Na(3)-O(14)  | 75.46(15)  |
| O(2)-Na(4)-O(10)1  | 81.53(17)  | O(18)2-Na(3)-O(14)  | 120.10(16) | O(2)1-Na(4)-O(10)  | 81.52(17)  |
| O(18)-Na(3)-O(18)  | 81.70(19)  | O(18)-Na(3)-O(19)   | 70.97(17)  | O(18)-Na(3)-O(23)  | 149.7(2)   |
| O(19)-Na(3)-O(14)  | 129.59(19) | O(19)-Na(3)-O(18)2  | 91.07(17)  | O(3)-Na(4)-O(3)1   | 98.4(3)    |
| O(19)-Na(3)-O(23)  | 97.32(19)  | O(3)-Na(4)-O(10)1   | 92.80(17)  | O(3)1-Na(4)-O(10)1 | 126.75(17) |
| O(3)-Na(4)-O(10)   | 126.75(17) | O(3)1-Na(4)-O(10)   | 92.80(17)  | O(22)-Na(3)-Dy(2)  | 110.75(13) |
| O(22)-Na(3)-O(18)  | 132.12(19) | O(22)-Na(3)-O(18)2  | 75.70(15)  | O(22)-Na(3)-O(19)  | 149.3(2)   |
| O(22)-Na(3)-O(23)  | 71.02(17)  | O(23)-Na(3)-O(14)   | 93.19(17)  | O(23)-Na(3)-O(18)2 | 127.3(2)   |
| O(13)-Dy(2)-O(21)  | 83.69(16)  | O(13)-Dy(2)-N(8)    | 62.48(16)  | O(13)-Dy(2)-N(10)  | 67.81(17)  |
| O(13)-Dy(2)-N(12)  | 137.71(17) | O(14)-Dy(2)-O(13)   | 129.41(15) | O(14)-Dy(2)-O(17)  | 140.14(14) |
| O(14)-Dy(2)-O(21)  | 81.70(15)  | O(14)-Dy(2)-O(22)2  | 81.28(15)  | O(14)-Dy(2)-N(8)   | 67.07(15)  |
| O(14)-Dy(2)-N(10)  | 142.75(17) | O(14)-Dy(2)-N(12)2  | 72.69(16)  |                    |            |

---

**Complex 2a**

|             |           |             |           |             |           |             |           |
|-------------|-----------|-------------|-----------|-------------|-----------|-------------|-----------|
| Dy(2)-O(17) | 2.304(10) | Dy(4)-O(8)  | 2.324(10) | Dy(1)-O(20) | 2.403(9)  | Dy(3)-O(15) | 2.384(10) |
| Dy(2)-O(20) | 2.318(10) | Dy(4)-O(9)  | 2.438(10) | Dy(1)-O(24) | 2.402(10) | Dy(3)-O(8)  | 2.362(10) |
| Dy(2)-O(14) | 2.393(10) | Dy(4)-O(11) | 2.359(10) | Dy(1)-O(3)  | 2.403(9)  | Dy(3)-O(17) | 2.398(10) |
| Dy(2)-O(1)  | 2.481(9)  | Dy(4)-O(1)  | 2.515(9)  | Dy(1)-O(1)  | 2.545(9)  | Dy(3)-O(11) | 2.325(9)  |
| Dy(2)-N(13) | 2.598(12) | Dy(4)-O(5)  | 2.310(9)  | Dy(1)-O(5)  | 2.385(9)  | Dy(3)-O(14) | 2.321(9)  |
| Dy(2)-O(23) | 2.403(10) | Dy(4)-O(2)  | 2.428(10) | Dy(1)-N(15) | 2.644(11) | Dy(3)-O(1)  | 2.521(9)  |
| Dy(2)-O(18) | 2.416(10) | Dy(4)-O(6)  | 2.395(10) | Dy(1)-N(1)  | 2.647(11) | Dy(3)-O(12) | 2.459(10) |
| Dy(2)-O(21) | 2.408(11) | Dy(4)-N(4)  | 2.601(10) | Dy(1)-O(23) | 2.316(10) | Dy(3)-N(9)  | 2.676(11) |
| Dy(2)-N(11) | 2.633(12) | Dy(4)-N(5)  | 2.606(12) | Dy(1)-O(2)  | 2.301(10) | Dy(3)-N(7)  | 2.630(12) |

---



|                   |          |                   |          |                   |          |
|-------------------|----------|-------------------|----------|-------------------|----------|
| O(17)-Dy(2)-O(20) | 138.3(3) | O(20)-Dy(2)-O(21) | 125.6(3) | O(23)-Dy(2)-O(18) | 144.1(3) |
| O(17)-Dy(2)-O(14) | 77.5(3)  | O(20)-Dy(2)-N(11) | 148.1(4) | O(23)-Dy(2)-O(21) | 75.2(3)  |
| O(17)-Dy(2)-O(1)  | 68.8(3)  | O(14)-Dy(2)-O(1)  | 66.5(3)  | O(23)-Dy(2)-N(11) | 133.7(4) |
| O(17)-Dy(2)-N(13) | 146.0(4) | O(14)-Dy(2)-N(13) | 133.4(4) | O(18)-Dy(2)-O(1)  | 134.3(3) |
| O(17)-Dy(2)-O(23) | 87.5(3)  | O(14)-Dy(2)-O(23) | 133.7(3) | O(18)-Dy(2)-N(13) | 65.7(4)  |
| O(17)-Dy(2)-O(18) | 125.0(3) | O(14)-Dy(2)-O(18) | 74.4(3)  | O(18)-Dy(2)-N(11) | 62.1(4)  |
| O(17)-Dy(2)-O(21) | 84.1(3)  | O(14)-Dy(2)-O(21) | 143.9(3) | O(21)-Dy(2)-O(1)  | 133.7(3) |
| O(17)-Dy(2)-N(11) | 67.0(4)  | O(14)-Dy(2)-N(11) | 79.6(3)  | O(21)-Dy(2)-N(13) | 62.5(4)  |
| O(20)-Dy(2)-O(14) | 87.4(3)  | O(1)-Dy(2)-N(13)  | 130.4(3) | O(21)-Dy(2)-O(18) | 91.9(3)  |
| O(20)-Dy(2)-O(1)  | 69.6(3)  | O(1)-Dy(2)-N(11)  | 128.6(3) | O(21)-Dy(2)-N(11) | 64.6(4)  |
| O(20)-Dy(2)-N(13) | 67.6(4)  | N(13)-Dy(2)-N(11) | 101.0(4) | O(8)Dy(4)-O(9)    | 124.7(3) |
| O(20)-Dy(2)-O(23) | 75.2(4)  | O(23)-Dy(2)-O(1)  | 67.2(3)  | O(8)-Dy(4)O(11)   | 76.6(4)  |
| O(20)-Dy(2)-O(18) | 86.4(3)  | O(23)-Dy(2)-N(13) | 78.7(3)  | O(8)-Dy(4)-O(1)   | 67.9(3)  |
| O(8)-Dy(4)-O(2)   | 86.3(3)  | O(11)-Dy(4)-N(5)  | 78.6(4)  | O(2)-Dy(4)-O(1)   | 66.4(3)  |
| O(8)-Dy(4)-O(6)   | 86.5(4)  | O(1)-Dy(4)-N(4)   | 131.2(3) | O(2)-Dy(4)-N(4)   | 82.5(3)  |
| O(8)-Dy(4)-N(4)   | 149.1(4) | O(1)-Dy(4)-N(5)   | 127.2(3) | O(2)-Dy(4)-N(5)   | 133.2(4) |
| O(8)-Dy(4)-N(5)   | 66.3(4)  | O(5)-Dy(4)-O(8)   | 137.2(3) | O(6)-Dy(4)-O(9)   | 91.2(4)  |
| O(9)-Dy(4)-O(1)   | 134.2(3) | O(5)-Dy(4)-O(9)   | 86.7(3)  | O(6)-Dy(4)-O(1)   | 134.6(3) |
| O(9)-Dy(4)-N(4)   | 63.6(3)  | O(5)-Dy(4)-O(11)  | 87.3(3)  | O(6)-Dy(4)-O(2)   | 75.5(4)  |
| O(9)-Dy(4)-N(5)   | 62.6(4)  | O(5)-Dy(4)-O(1)   | 69.4(3)  | O(6)-Dy(4)-N(4)   | 62.8(4)  |
| O(11)-Dy(4)-O(9)  | 74.1(3)  | O(5)-Dy(4)-O(2)   | 76.1(3)  | O(6)-Dy(4)-N(5)   | 66.1(4)  |
| O(11)-Dy(4)-O(1)  | 66.5(3)  | O(5)-Dy(4)-O(6)   | 124.6(3) | N(4)-Dy(4)-N(5)   | 101.6(4) |
| O(11)-Dy(4)-O(2)  | 132.9(3) | O(5)-Dy(4)-N(4)   | 67.1(3)  | O(20)-Dy(1)-O(1)  | 67.2(3)  |
| O(11)-Dy(4)-O(6)  | 144.5(4) | O(5)-Dy(4)-N(5)   | 148.7(4) | O(20)-Dy(1)-N(15) | 77.6(3)  |
| O(11)-Dy(4)-N(4)  | 130.9(3) | O(2)-Dy(4)-O(9)   | 145.9(3) | O(20)-Dy(1)-N(1)  | 132.8(4) |
| O(24)-Dy(1)-O(20) | 77.4(3)  | O(5)-Dy(1)-O(24)  | 142.3(3) | O(23)-Dy(1)-N(1)  | 150.1(4) |
| O(24)-Dy(1)-O(3)  | 86.0(3)  | O(5)-Dy(1)-O(3)   | 75.5(3)  | O(2)-Dy(1)-Dy(2)  | 101.3(2) |
| O(24)-Dy(1)-O(1)  | 137.1(3) | O(5)-Dy(1)-O(1)   | 67.7(3)  | O(2)-Dy(1)-Dy(4)  | 42.6(2)  |
| O(24)-Dy(1)-N(15) | 62.4(4)  | O(5)-Dy(1)-N(15)  | 132.1(4) | O(2)-Dy(1)-O(20)  | 87.4(3)  |
| O(24)-Dy(1)-N(1)  | 63.8(3)  | O(5)-Dy(1)-N(1)   | 78.6(3)  | O(2)-Dy(1)-O(24)  | 87.9(3)  |
| O(3)-Dy(1)-O(20)  | 142.8(3) | N(15)-Dy(1)-N(1)  | 104.7(3) | O(2)-Dy(1)-O(3)   | 125.4(3) |
| O(3)-Dy(1)-O(1)   | 136.9(3) | O(23)-Dy(1)-O(20) | 75.2(3)  | O(2)-Dy(1)-O(1)   | 67.7(3)  |
| O(3)-Dy(1)-N(15)  | 65.3(3)  | O(23)-Dy(1)-O(24) | 126.4(3) | O(2)-Dy(1)-O(5)   | 77.2(3)  |
| O(1)-Dy(1)-N(15)  | 127.8(3) | O(23)-Dy(1)-O(1)  | 67.4(3)  | O(15)-Dy(3)-O(17) | 74.7(3)  |
| O(1)-Dy(1)-N(1)   | 127.6(3) | O(23)-Dy(1)-O(5)  | 86.4(3)  | O(15)-Dy(3)-O(1)  | 136.1(3) |
| O(5)-Dy(1)-O(20)  | 134.9(3) | O(23)-Dy(1)-N(15) | 67.2(3)  | O(15)-Dy(3)-O(12) | 86.6(4)  |
| O(15)-Dy(3)-N(9)  | 63.0(3)  | O(11)-Dy(3)-O(15) | 90.1(3)  | O(14)-Dy(3)-O(12) | 91.5(4)  |
| O(15)-Dy(3)-N(7)  | 63.7(4)  | O(11)-Dy(3)-O(8)  | 76.5(4)  | O(14)-Dy(3)-N(9)  | 66.4(3)  |
| O(8)-Dy(3)-O(15)  | 145.4(3) | O(11)-Dy(3)-O(17) | 84.8(3)  | O(14)-Dy(3)-N(7)  | 153.6(4) |
| O(8)-Dy(3)-O(17)  | 133.9(3) | O(11)-Dy(3)-O(1)  | 66.9(3)  | O(1)-Dy(3)-N(9)   | 128.4(3) |
| O(8)-Dy(3)-O(1)   | 67.2(3)  | O(11)-Dy(3)-O(12) | 123.6(3) | O(1)-Dy(3)-N(7)   | 127.7(3) |
| O(8)-Dy(3)-O(12)  | 75.3(4)  | O(11)-Dy(3)-N(9)  | 152.5(4) | O(12)-Dy(3)-O(1)  | 137.3(4) |
| O(8)-Dy(3)-N(9)   | 128.8(4) | O(11)-Dy(3)-N(7)  | 65.5(4)  | O(12)-Dy(3)-N(9)  | 63.9(4)  |
| O(8)-Dy(3)-N(7)   | 81.8(4)  | O(14)-Dy(3)-O(15) | 124.1(3) | O(12)-Dy(3)-N(7)  | 62.8(4)  |

|                   |          |                   |          |                  |          |
|-------------------|----------|-------------------|----------|------------------|----------|
| O(17)-Dy(3)-O(1)  | 66.7(3)  | O(14)-Dy(3)-O(8)  | 86.2(3)  | N(7)-Dy(3)-N(9)  | 103.9(4) |
| O(17)-Dy(3)-O(12) | 146.4(3) | O(14)-Dy(3)-O(17) | 77.1(3)  | O(3)-Dy(1)-N(1)  | 62.3(3)  |
| O(17)-Dy(3)-N(9)  | 82.7(3)  | O(14)-Dy(3)-O(11) | 133.7(3) | O(23)-Dy(1)-O(3) | 89.0(3)  |
| O(17)-Dy(3)-N(7)  | 127.5(4) | O(14)-Dy(3)-O(1)  | 66.9(3)  | O(2)-Dy(1)-N(15) | 148.8(4) |

---

**Complex 2b**

---

|             |          |             |          |             |          |             |          |
|-------------|----------|-------------|----------|-------------|----------|-------------|----------|
| Dy(1)-O(1)  | 2.540(4) | Dy(2)-O(1)  | 2.492(4) | Dy(3)-O(1)  | 2.544(4) | Dy(4)-O(1)  | 2.496(4) |
| Dy(1)-O(2)  | 2.303(4) | Dy(2)-O(2)  | 2.402(4) | Dy(3)-O(8)  | 2.311(4) | Dy(4)-O(11) | 2.328(4) |
| Dy(1)-O(3)  | 2.407(4) | Dy(2)-O(5)  | 2.317(4) | Dy(3)-O(9)  | 2.392(4) | Dy(4)-O(12) | 2.425(4) |
| Dy(1)-O(5)  | 2.399(4) | Dy(2)-O(6)  | 2.391(4) | Dy(3)-O(11) | 2.373(4) | Dy(4)-O(15) | 2.310(4) |
| Dy(1)-O(12) | 2.317(4) | Dy(2)-O(8)  | 2.402(4) | Dy(3)-O(18) | 2.313(4) | Dy(4)-O(16) | 2.398(5) |
| Dy(1)-O(13) | 2.397(4) | Dy(2)-O(9)  | 2.301(4) | Dy(3)-O(19) | 2.453(5) | Dy(4)-O(18) | 2.373(4) |
| Dy(1)-O(15) | 2.373(4) | Dy(2)-N(3)  | 2.619(5) | Dy(3)-O(23) | 2.387(4) | Dy(4)-O(21) | 2.429(4) |
| Dy(1)-N(1)  | 2.644(5) | Dy(2)-O(37) | 2.430(4) | Dy(3)-N(11) | 2.621(5) | Dy(4)-N(9)  | 2.642(5) |
| Dy(1)-N(7)  | 2.665(5) | Dy(2)-N(20) | 2.631(5) | Dy(3)-N(16) | 2.640(5) | Dy(4)-N(14) | 2.617(5) |

|                   |            |                   |            |                   |            |
|-------------------|------------|-------------------|------------|-------------------|------------|
| O(1)-Dy(1)-N(1)   | 128.03(14) | O(6)-Dy(2)-O(1)   | 133.81(15) | O(18)-Dy(3)-N(16) | 152.03(16) |
| O(1)-Dy(1)-N(7)   | 127.04(13) | O(6)-Dy(2)-O(2)   | 76.12(15)  | O(19)-Dy(3)-O(1)  | 138.02(16) |
| O(2)-Dy(1)-O(1)   | 67.16(14)  | O(6)-Dy(2)-O(8)   | 143.01(14) | O(19)-Dy(3)-N(11) | 61.82(17)  |
| O(2)-Dy(1)-O(3)   | 126.03(14) | O(6)-Dy(2)-N(3)   | 62.59(16)  | O(19)-Dy(3)-N(16) | 64.45(16)  |
| O(2)-Dy(1)-O(5)   | 75.01(15)  | O(6)-Dy(2)-O(37)  | 92.15(15)  | O(23)-Dy(3)-O(1)  | 136.21(15) |
| O(2)-Dy(1)-O(12)  | 134.28(14) | O(6)-Dy(2)-N(20)  | 64.47(16)  | O(23)-Dy(3)-O(9)  | 74.76(14)  |
| O(2)-Dy(1)-O(13)  | 90.09(15)  | O(8)-Dy(2)-O(1)   | 66.50(13)  | O(18)-Dy(3)-N(16) | 152.03(16) |
| O(2)-Dy(1)-O(15)  | 86.42(14)  | O(8)-Dy(2)-O(2)   | 133.03(13) | O(19)-Dy(3)-O(1)  | 138.02(16) |
| O(2)-Dy(1)-N(1)   | 67.01(14)  | O(8)-Dy(2)-N(3)   | 134.89(15) | O(19)-Dy(3)-N(11) | 61.82(17)  |
| O(2)-Dy(1)-N(7)   | 150.86(16) | O(8)-Dy(2)-O(37)  | 75.12(14)  | O(19)-Dy(3)-N(16) | 64.45(16)  |
| O(1)-Dy(1)-N(1)   | 128.03(14) | O(8)-Dy(2)-N(20)  | 79.03(15)  | O(1)-Dy(4)-N(9)   | 130.45(14) |
| O(3)-Dy(1)-O(1)   | 137.42(14) | O(9)-Dy(2)-O(1)   | 69.28(14)  | O(1)-Dy(4)-N(14)  | 128.31(14) |
| O(3)-Dy(1)-N(1)   | 62.53(15)  | O(9)-Dy(2)-O(2)   | 87.75(14)  | O(11)-Dy(4)-O(1)  | 68.68(14)  |
| O(3)-Dy(1)-N(7)   | 64.01(15)  | O(9)-Dy(2)-O(5)   | 138.36(14) | O(11)-Dy(4)-O(12) | 86.73(14)  |
| O(5)-Dy(1)-O(1)   | 67.06(13)  | O(9)-Dy(2)-O(6)   | 83.49(15)  | O(11)-Dy(4)-O(16) | 85.66(15)  |
| O(5)-Dy(1)-O(3)   | 77.57(14)  | O(9)-Dy(2)-O(8)   | 76.87(14)  | O(11)-Dy(4)-O(18) | 76.61(15)  |
| O(5)-Dy(1)-N(1)   | 78.62(15)  | O(9)-Dy(2)-N(3)   | 145.38(16) | O(11)-Dy(4)-O(21) | 125.01(15) |
| O(5)-Dy(1)-N(7)   | 132.51(16) | O(9)-Dy(2)-O(37)  | 125.72(14) | O(11)-Dy(4)-N(9)  | 148.08(15) |
| O(12)-Dy(1)-O(1)  | 67.12(13)  | O(9)-Dy(2)-N(20)  | 67.31(15)  | O(11)-Dy(4)-N(14) | 66.86(15)  |
| O(12)-Dy(1)-O(3)  | 88.77(14)  | N(3)-Dy(2)-N(20)  | 101.10(15) | O(12)-Dy(4)-O(21) | 145.12(14) |
| O(12)-Dy(1)-O(5)  | 86.99(14)  | O(37)-Dy(2)-O(1)  | 134.02(14) | O(12)-Dy(4)-N(9)  | 81.35(14)  |
| O(12)-Dy(1)-O(13) | 124.85(14) | O(37)-Dy(2)-N(3)  | 65.98(15)  | O(12)-Dy(4)-N(14) | 133.92(16) |
| O(12)-Dy(1)-O(15) | 77.05(14)  | O(37)-Dy(2)-N(20) | 62.33(16)  | O(15)-Dy(4)-O(1)  | 69.40(13)  |
| O(12)-Dy(1)-N(1)  | 149.94(15) | O(1)-Dy(3)-N(11)  | 127.17(14) | O(15)-Dy(4)-O(11) | 138.07(14) |
| O(12)-Dy(1)-N(7)  | 66.31(15)  | O(1)-Dy(3)-N(16)  | 128.40(14) | O(15)-Dy(4)-O(12) | 76.14(14)  |
| O(13)-Dy(1)-O(1)  | 136.94(14) | O(8)-Dy(3)-O(1)   | 66.93(13)  | O(15)-Dy(4)-O(16) | 124.84(15) |
| O(13)-Dy(1)-O(3)  | 85.61(15)  | O(8)-Dy(3)-O(9)   | 76.88(14)  | O(15)-Dy(4)-O(18) | 87.45(14)  |
| O(13)-Dy(1)-O(5)  | 143.78(14) | O(8)-Dy(3)-O(11)  | 86.17(14)  | O(15)-Dy(4)-O(21) | 85.95(15)  |

---

|                   |            |                   |            |                   |            |
|-------------------|------------|-------------------|------------|-------------------|------------|
| O(13)-Dy(1)-N(1)  | 65.16(15)  | O(8)-Dy(3)-O(18)  | 133.48(14) | O(15)-Dy(4)-N(9)  | 66.97(15)  |
| O(13)-Dy(1)-N(7)  | 62.07(16)  | O(37)-Dy(2)-O(1)  | 134.02(14) | O(15)-Dy(4)-N(14) | 147.49(17) |
| O(15)-Dy(1)-O(1)  | 67.70(13)  | O(8)-Dy(3)-O(23)  | 124.42(14) | O(16)-Dy(4)-O(1)  | 134.32(15) |
| O(15)-Dy(1)-O(3)  | 142.55(15) | O(8)-Dy(3)-N(11)  | 153.51(17) | O(16)-Dy(4)-O(12) | 75.43(14)  |
| O(15)-Dy(1)-O(5)  | 134.73(14) | O(8)-Dy(3)-N(16)  | 66.47(15)  | O(16)-Dy(4)-O(21) | 91.50(15)  |
| O(15)-Dy(1)-O(13) | 75.14(14)  | O(9)-Dy(3)-O(1)   | 67.06(13)  | O(16)-Dy(4)-N(9)  | 62.73(16)  |
| O(15)-Dy(1)-N(1)  | 131.10(15) | O(9)-Dy(3)-O(19)  | 146.13(14) | O(16)-Dy(4)-N(14) | 65.93(16)  |
| O(15)-Dy(1)-N(7)  | 78.57(15)  | O(9)-Dy(3)-N(11)  | 127.96(17) | O(18)-Dy(4)-O(1)  | 66.53(13)  |
| N(1)-Dy(1)-N(7)   | 104.93(15) | O(9)-Dy(3)-N(16)  | 81.94(15)  | O(18)-Dy(4)-O(12) | 132.83(13) |
| O(1)-Dy(2)-N(3)   | 129.68(14) | O(11)-Dy(3)-O(1)  | 67.19(14)  | O(18)-Dy(4)-O(16) | 144.36(15) |
| O(2)-Dy(2)-O(1)   | 66.54(13)  | O(11)-Dy(3)-O(9)  | 134.24(14) | O(18)-Dy(4)-O(21) | 74.65(14)  |
| O(2)-Dy(2)-N(3)   | 78.06(14)  | O(11)-Dy(3)-O(19) | 75.59(15)  | O(18)-Dy(4)-N(9)  | 131.96(15) |
| O(2)-Dy(2)-O(37)  | 143.48(13) | O(11)-Dy(3)-O(23) | 145.12(14) | O(18)-Dy(4)-N(14) | 78.66(16)  |
| O(2)-Dy(2)-N(20)  | 134.77(16) | O(11)-Dy(3)-N(11) | 81.15(16)  | O(21)-Dy(4)-O(1)  | 134.18(15) |
| O(5)-Dy(2)-O(1)   | 69.10(13)  | O(11)-Dy(3)-N(16) | 129.15(16) | O(21)-Dy(4)-N(9)  | 64.04(15)  |
| O(5)-Dy(2)-O(2)   | 74.71(15)  | O(18)-Dy(3)-O(1)  | 66.56(13)  | O(21)-Dy(4)-N(14) | 62.15(17)  |
| O(5)-Dy(2)-O(6)   | 126.24(15) | O(18)-Dy(3)-O(9)  | 84.64(14)  | N(14)-Dy(4)-N(9)  | 101.22(15) |
| O(5)-Dy(2)-O(8)   | 87.94(14)  | O(18)-Dy(3)-O(11) | 76.88(15)  | O(18)-Dy(4)-N(9)  | 131.96(15) |
| O(5)-Dy(2)-N(3)   | 67.79(15)  | O(18)-Dy(3)-O(19) | 123.36(15) | O(5)-Dy(2)-N(20)  | 147.51(16) |
| O(5)-Dy(2)-O(37)  | 85.66(14)  | O(18)-Dy(3)-O(23) | 89.85(15)  | O(18)-Dy(3)-N(11) | 65.71(16)  |

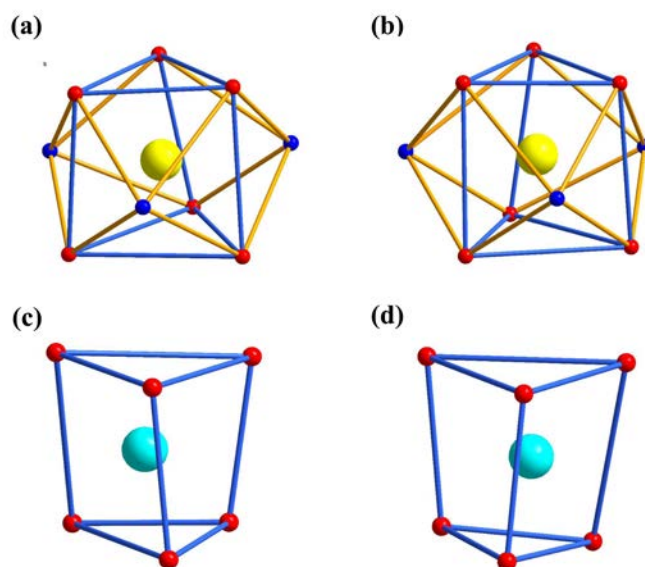

**Figure S5** Coordination geometry of  $\text{Dy}^{3+}$  ions in (a) complex **1a** and (b) complex **1b**. ( $\text{Dy}^{3+}$ : yellow, O : red, N : blue) Coordination geometry of  $\text{Na}^+$  ions in (c) complex **1a** and (d) complex **1b**. (O : red, N : blue,  $\text{Na}^+$ : light blue)

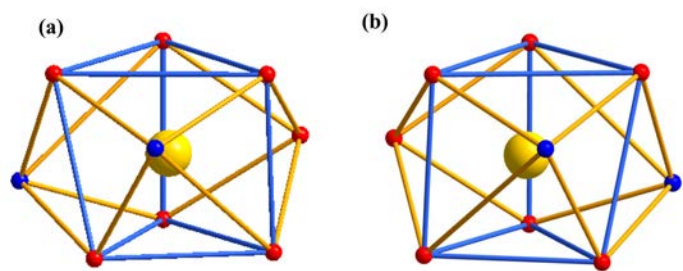

**Figure S6** Coordination geometry of  $\text{Dy}^{3+}$  ions in (a) complex **2a** and (b) complex **2b**. ( $\text{Dy}^{3+}$ : yellow, O : red, N : blue)

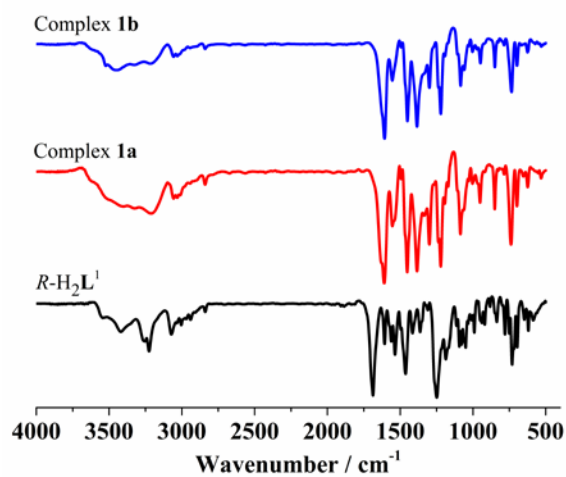

**Figure S7** IR spectra of complex **1a**, complex **1b** and  $S\text{-H}_2\text{L}^1$ .

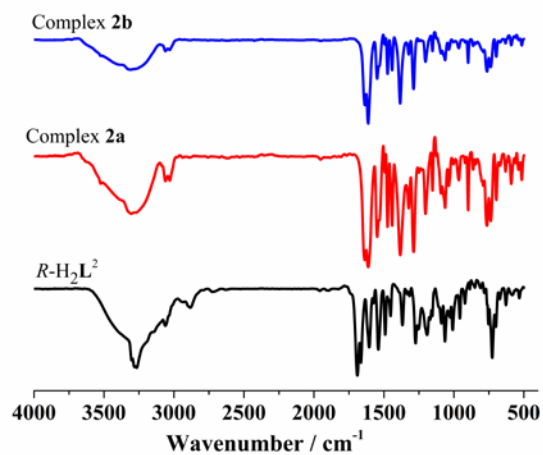

**Figure S8** IR spectra of complex **2a**, complex **2b** and  $S\text{-H}_2\text{L}^2$ .

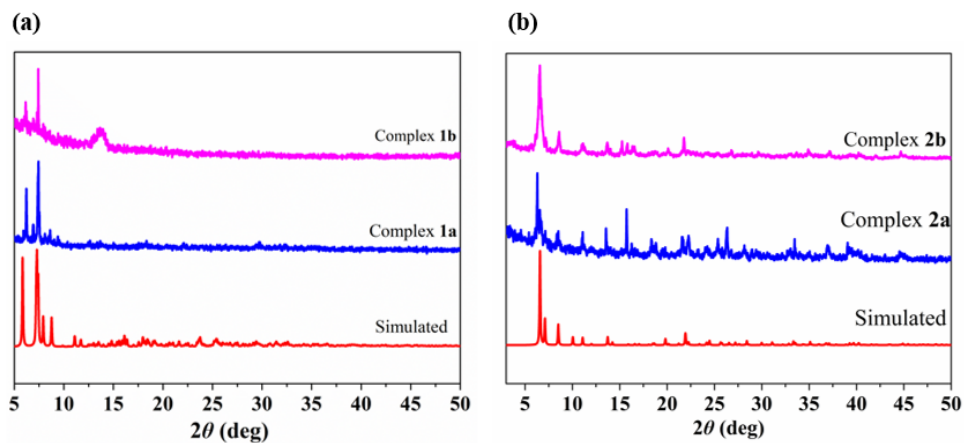

**Figure S9** Comparing the simulated PXR D with experimental patterns.

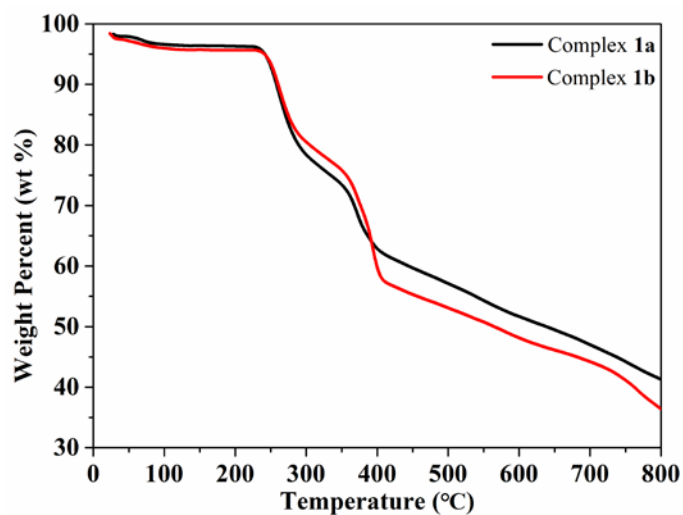

**Figure S10** TGA spectra of complex **1a** and **1b**.

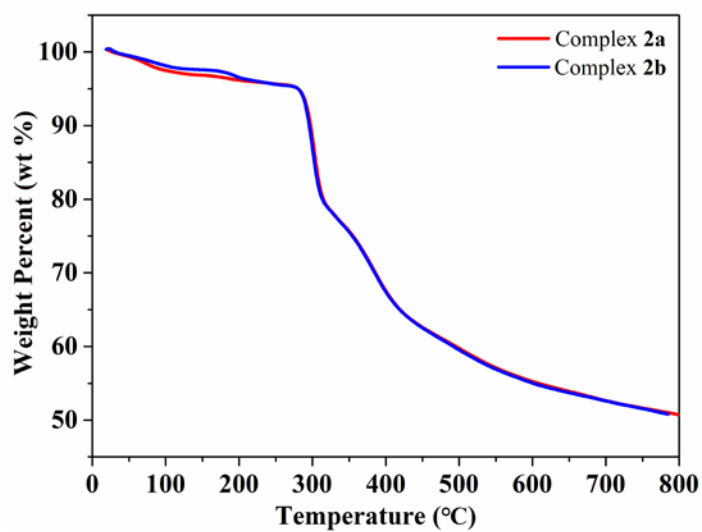

**Figure S11** TGA spectra of complex **2a** and **2b**.

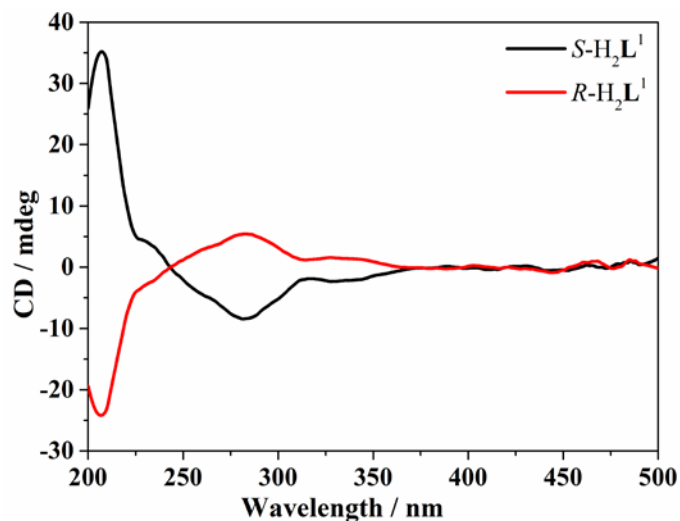

**Figure S12** CD spectra of  $S\text{-H}_2\text{L}^1$  and  $R\text{-H}_2\text{L}^1$  in methanol solution ( $3 \times 10^{-4}$  M).

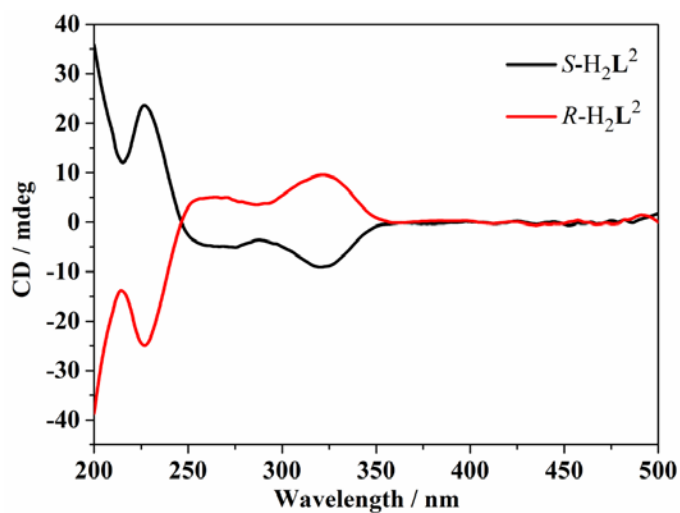

**Figure S13** CD spectra of  $S\text{-H}_2\text{L}^2$  and  $R\text{-H}_2\text{L}^2$  in methanol solution ( $3 \times 10^{-4}$  M).

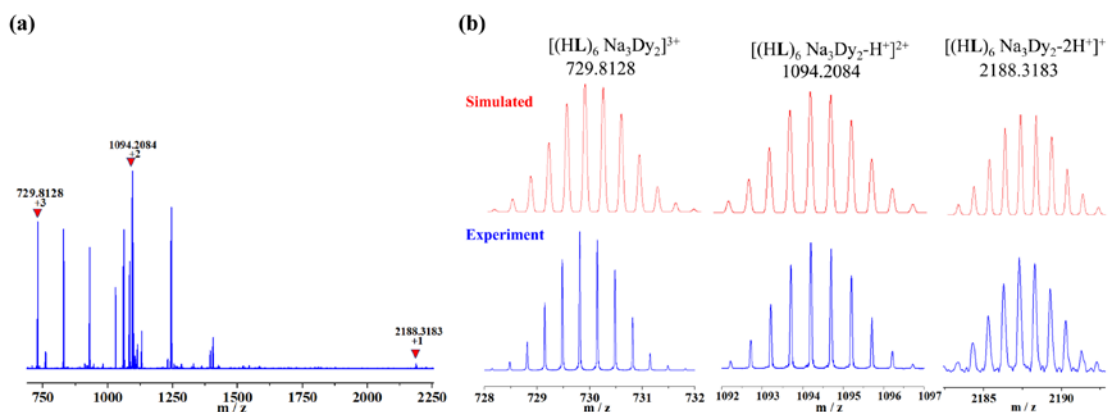

**Figure S14** (a) HRESI-MS spectrum of complex **1a** in methanol. (b) Compared the experimental isotopic distribution with the theoretical isotopic distribution and the assignments of corresponding peaks.

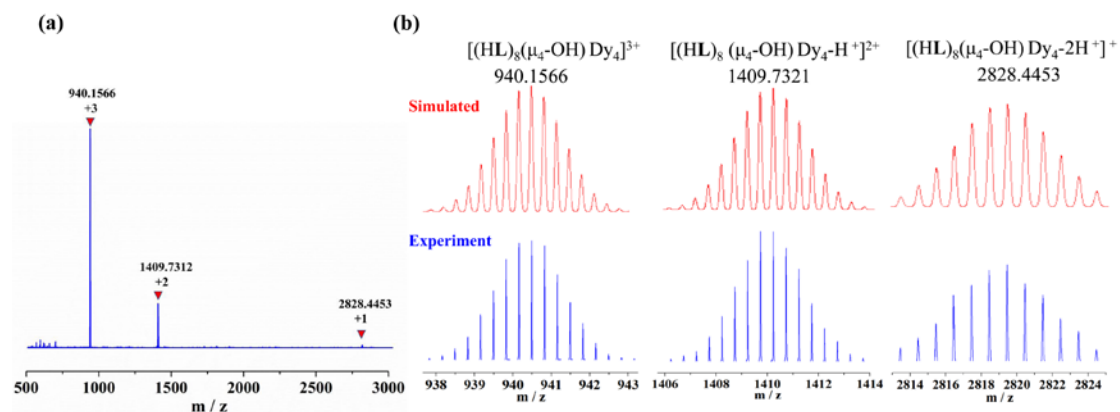

**Figure S15** (a) HRESI-MS spectrum of complex **2a** in methanol. (b) Compared the experimental isotopic distribution with the theoretical isotopic distribution and the assignments of corresponding peaks.

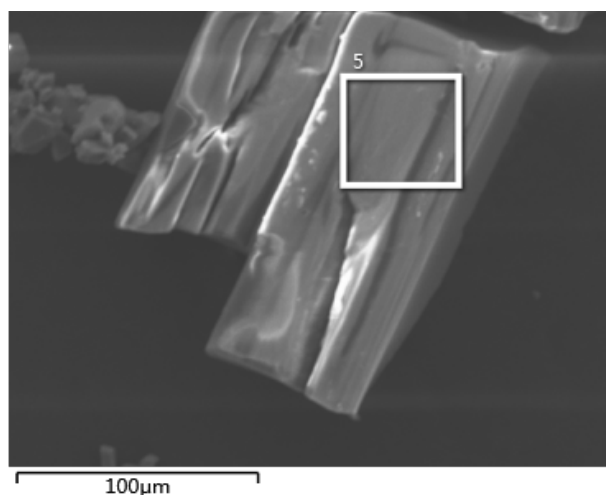

**Figure S16** SEM image of crystal prepared from mixed-metal experiment.

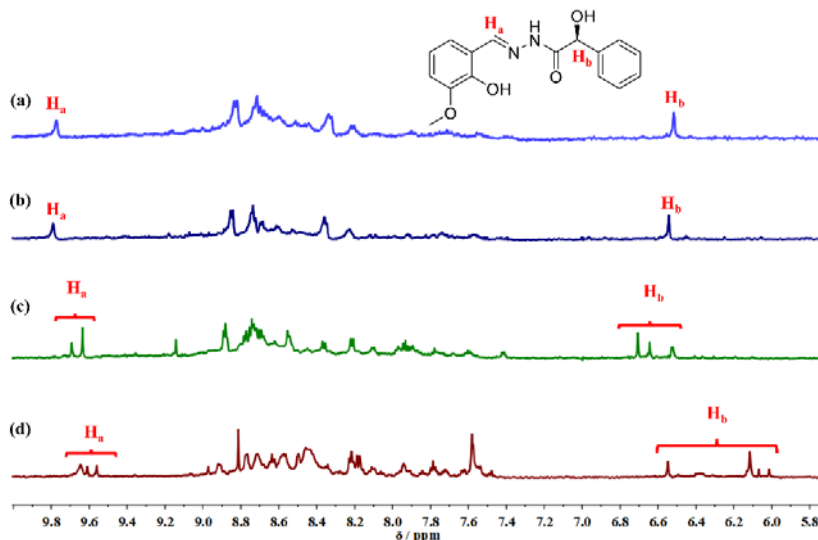

**Figure S17.** The partial  $^1\text{H-NMR}$  spectra ( $\text{CD}_3\text{OD}$  and  $\text{CD}_3\text{CN}$ ;  $v:v = 2:1$ ) of  $(S)\text{-H}_2\text{L}^1$  with the mixed metal ions and single metal ions: (a) mixed metal ions; (b)  $\text{Na}^+$ ; (c)  $\text{K}^+$ ; (d)  $\text{Li}^+$ .
